# Supplementary material
Source: PubMed Central journal article supplement (PMC2879617)
Supplement: NIHMS180706-supplement-1.pdf [file NIHMS180706-supplement-1.pdf]

**Supplemental Table 1. Nucleotide frequency at Segregating Sites in the *Aedes triseriatus* Inhibitor of Apoptosis 1 gene.**

| Nuc. | Freq. of the Most Common Nucleotide | Hexp   | Hobs   | Probability of Hardy-Weinberg Equilibrium | Substitution  | Codon | Amino Acid |
|------|-------------------------------------|--------|--------|-------------------------------------------|---------------|-------|------------|
| -390 | 0.7692                              | 0.3551 |        | 0.7602                                    | a > g         |       |            |
| -389 | 0.6538                              | 0.4527 |        | 0.1772                                    | g > t         |       |            |
| -370 | 0.963                               | 0.0713 |        | 0.1649                                    | g > a         |       |            |
| -363 | 0.9556                              | 0.0849 | 0      | 0.1667                                    | t > g         |       |            |
| -361 | 0.7167                              | 0.4061 | 0.0112 | 0.0001                                    | c > a         |       |            |
| -353 | 0.978                               | 0.043  | 0      | 0.2884                                    | a > g         |       |            |
| -351 | 0.9451                              | 0.1038 | 0      | 0.5386                                    | c > t         |       |            |
| -344 | 0.989                               | 0.0218 | 0      | 0.1505                                    | a > t         |       |            |
| -341 | 0.9670, 0.0220                      | 0.0643 | 0      | 0.391, 0.2884, 0.1505                     | a > c > t     |       |            |
| -340 | 0.9615                              | 0.074  | 0.0112 | 0.678                                     | c > t         |       |            |
| -335 | 0.9176, 0.0549                      | 0.1542 | 0.0112 | 0.0654, 0.5386, 0.0249                    | g > a > -     |       |            |
| -334 | 0.9725                              | 0.0535 | 0.0112 | 0.0249                                    | a > -         |       |            |
| -333 | 0.9615, 0.0275                      | 0.0746 | 0.0112 | 0.0076, 0.0249, 0.1596                    | a > - > g     |       |            |
| -332 | 0.9451                              | 0.1038 | 0      | 0.5386                                    | g > c         |       |            |
| -326 | 0.9945                              | 0.0109 |        | 0.3107                                    | a > g         |       |            |
| -324 | 0.9945                              | 0.0109 | 0.0112 | 0.3213                                    | c > a         |       |            |
| -321 | 0.9780, 0.0110                      | 0.0433 | 0.0225 | 0.3014, 0.2063, 0.1505                    | c > g = t     |       |            |
| -320 | 0.967                               | 0.0638 | 0      | 0.0138                                    | a > g         |       |            |
| -319 | 0.989                               | 0.0218 | 0      | 0.1596                                    | a > g         |       |            |
| -318 | 0.9121, 0.0549, 0.0275              | 0.1643 | 0.0449 | 0.3168, 0.5386, 0.1817, 0.3107            | c > a > g > t |       |            |
| -316 | 0.9615                              | 0.074  | 0.0562 | 0.0577                                    | - > g         |       |            |
| -315 | 0.9615                              | 0.074  | 0.0562 | 0.0577                                    | - > a         |       |            |

|      |                |        |        |                        |           |  |  |
|------|----------------|--------|--------|------------------------|-----------|--|--|
| -314 | 0.9451         | 0.1038 | 0      | 0.5386                 | g > -     |  |  |
| -313 | 0.9451         | 0.1038 | 0      | 0.5386                 | a > -     |  |  |
| -310 | 0.989          | 0.0218 | 0      | 0.1505                 | g > c     |  |  |
| -298 | 0.9945         | 0.0109 | 0.0112 | 0.3107                 | a > g     |  |  |
| -286 | 0.9835         | 0.0325 | 0.0337 | 0.5734                 | c > t     |  |  |
| -282 | 0.9341, 0.0440 | 0.125  | 0      | 0.2479, 0.1572, 0.2884 | a > - > t |  |  |
| -281 | 0.956          | 0.0841 | 0      | 0.1572                 | c > -     |  |  |
| -280 | 0.956          | 0.0841 | 0      | 0.1572                 | g > -     |  |  |
| -279 | 0.989          | 0.0218 | 0      | 0.1505                 | a > -     |  |  |
| -278 | 0.989          | 0.0218 | 0      | 0.1505                 | c > -     |  |  |
| -277 | 0.9780, 0.0110 | 0.0433 | 0      | 0.2884, 0.1596, 0.1505 | g > c = - |  |  |
| -276 | 0.9945         | 0.0109 | 0.0112 | 0.3213                 | g > -     |  |  |
| -274 | 0.9945         | 0.0109 | 0.0112 | 0.3213                 | g > -     |  |  |
| -272 | 0.989          | 0.0218 | 0      | 0.1596                 | t > c     |  |  |
| -271 | 0.989          | 0.0218 | 0      | 0.1596                 | g > a     |  |  |
| -270 | 0.9945         | 0.0109 | 0.0112 | 0.3213                 | t > -     |  |  |
| -269 | 0.9945         | 0.0109 | 0.0112 | 0.3213                 | t > -     |  |  |
| -266 | 0.989          | 0.0218 | 0      | 0.1596                 | a > g     |  |  |
| -265 | 0.989          | 0.0218 | 0      | 0.1596                 | c > t     |  |  |
| -263 | 0.989          | 0.0218 | 0      | 0.1596                 | a > g     |  |  |
| -259 | 0.9945         | 0.0109 |        | 0.3107                 | a > g     |  |  |
| -257 | 0.956          | 0.0841 | 0.0225 | 0.0042                 | c > t     |  |  |
| -254 | 0.967          | 0.0638 | 0      | 0.422                  | t > c     |  |  |
| -244 | 0.978          | 0.043  | 0      | 0.0409                 | c > t     |  |  |
| -235 | 0.9945         | 0.0109 | 0.0112 | 0.3107                 | c > t     |  |  |
| -228 | 0.9286         | 0.1326 | 0.0337 | 0.4109                 | g > a     |  |  |

|      |                |        |        |                        |           |  |  |
|------|----------------|--------|--------|------------------------|-----------|--|--|
| -227 | 0.989          | 0.0218 | 0      | 0.1596                 | a > g     |  |  |
| -225 | 0.9945         | 0.0109 | 0.0112 | 0.3107                 | c > t     |  |  |
| -224 | 0.989          | 0.0218 | 0      | 0.1596                 | t > c     |  |  |
| -223 | 0.9451         | 0.1038 | 0      | 0.5386                 | g > c     |  |  |
| -222 | 0.9505         | 0.0941 | 0.0112 | 0.3212                 | a > g     |  |  |
| -220 | 0.9396         | 0.1135 | 0.0112 | 0.7837                 | c > t     |  |  |
| -219 | 0.7363         | 0.3883 | 0.2247 | 0.6707                 | t > c     |  |  |
| -217 | 0.9835         | 0.0325 | 0.0337 | 0.0841                 | c > t     |  |  |
| -212 | 0.9725, 0.0220 | 0.0537 | 0.0562 | 0.1817, 0.3107, 0.0455 | a > g > c |  |  |
| -208 | 0.9396         | 0.1135 | 0.0562 | 0.0057                 | a > c     |  |  |
| -202 | 0.9945         | 0.0109 | 0.0112 | 0.3213                 | g > t     |  |  |
| -195 | 0.989          | 0.0218 | 0      | 0.1596                 | a > c     |  |  |
| -170 | 0.989          | 0.0218 | 0      | 0.1596                 | a > g     |  |  |
| -169 | 0.989          | 0.0218 | 0      | 0.1596                 | g > a     |  |  |
| -167 | 0.989          | 0.0218 | 0.0225 | 0.1505                 | c > t     |  |  |
| -160 | 0.9945         | 0.0109 | 0.0112 | 0.3213                 | t > a     |  |  |
| -150 | 0.9945         | 0.0109 |        | 0.3107                 | t > c     |  |  |
| -149 | 0.9945         | 0.0109 | 0.0112 | 0.3107                 | g > t     |  |  |
| -142 | 0.9396, 0.0495 | 0.1146 | 0.0337 | 0.3705, 0.7577, 0.1596 | c > t > - |  |  |
| -141 | 0.967          | 0.0638 | 0.0225 | 0.0118                 | - > c     |  |  |
| -140 | 0.967          | 0.0638 | 0.0225 | 0.0118                 | - > g     |  |  |
| -139 | 0.967          | 0.0638 | 0.0225 | 0.0118                 | - > t     |  |  |
| -138 | 0.9945         | 0.0109 | 0.0112 | 0.3213                 | c > -     |  |  |
| -137 | 0.9945         | 0.0109 | 0.0112 | 0.3213                 | g > -     |  |  |
| -136 | 0.9780, 0.0165 | 0.0432 | 0.0112 | 0.0455, 0.0841, 0.3213 | t > c > - |  |  |
| -135 | 0.9835, 0.0110 | 0.0326 | 0.0337 | 0.5476, 0.1505, 0.3213 | c > t > - |  |  |

|      |                |        |        |                        |           |  |  |
|------|----------------|--------|--------|------------------------|-----------|--|--|
| -134 | 0.9945         | 0.0109 | 0.0112 | 0.3213                 | g > -     |  |  |
| -128 | 0.9945         | 0.0109 | 0.0112 | 0.3213                 | g > a     |  |  |
| -126 | 0.989          | 0.0218 | 0      | 0.1505                 | c > -     |  |  |
| -125 | 0.9780, 0.0110 | 0.0433 | 0      | 0.2884, 0.1596, 0.1505 | g > c = - |  |  |
| -124 | 0.989          | 0.0218 | 0      | 0.1505                 | - > t     |  |  |
| -123 | 0.989          | 0.0218 | 0      | 0.1505                 | - > c     |  |  |
| -122 | 0.9890, 0.0055 | 0.0218 | 0.0112 | 0.1505, 0.3107, 0.3107 | - > g = c |  |  |
| -121 | 0.989          | 0.0218 | 0      | 0.1505                 | t > -     |  |  |
| -120 | 0.9615         | 0.074  | 0.0112 | 0.7219                 | - > c     |  |  |
| -119 | 0.9615         | 0.074  | 0.0112 | 0.7219                 | - > g     |  |  |
| -118 | 0.9615         | 0.074  | 0.0112 | 0.7219                 | - > t     |  |  |
| -114 | 0.9725         | 0.0535 | 0.0112 | 0.0219                 | g > c     |  |  |
| -101 | 0.989          | 0.0218 | 0      | 0.1596                 | t > g     |  |  |
| -94  | 0.989          | 0.0218 | 0      | 0.1505                 | a > g     |  |  |
| -77  | 0.956          | 0.0841 | 0      | 0.1572                 | t > c     |  |  |
| -76  | 0.9286         | 0.1326 | 0.0112 | 0.4109                 | a > t     |  |  |
| -75  | 0.9286         | 0.1326 | 0.0112 | 0.4109                 | c > t     |  |  |
| -74  | 0.989          | 0.0218 | 0.0225 | 0.1505                 | c > t     |  |  |
| -68  | 0.989          | 0.0218 | 0      | 0.1505                 | c > t     |  |  |
| -58  | 0.9945         | 0.0109 | 0.0112 | 0.3213                 | g > a     |  |  |
| -57  | 0.989          | 0.0218 | 0      | 0.1596                 | a > g     |  |  |
| -50  | 0.9835         | 0.0325 | 0.0112 | 0.5734                 | g > a     |  |  |
| -48  | 0.989          | 0.0218 | 0      | 0.1505                 | c > t     |  |  |
| -47  | 0.9231         | 0.142  | 0      | 0.5491                 | a > g     |  |  |
| -46  | 0.9505         | 0.0941 | 0.0562 | 0.7071                 | t > c     |  |  |
| -38  | 0.989, 0.0055  | 0.0218 | 0.0225 | 0.1596, 0.3212, 0.3213 | g > a = t |  |  |

|     |        |        |        |        |       |                          |              |
|-----|--------|--------|--------|--------|-------|--------------------------|--------------|
| -31 | 0.6154 | 0.4734 | 0.0674 | 0.4674 | a > t |                          |              |
| -30 | 0.9835 | 0.0325 | 0.0112 | 0.5734 | a > t |                          |              |
| -29 | 0.978  | 0.043  | 0      | 0.2884 | c > t |                          |              |
| -26 | 0.989  | 0.0218 | 0      | 0.1596 | g > a |                          |              |
| -22 | 0.989  | 0.0218 | 0.0225 | 0.2063 | g > a |                          |              |
| -19 | 0.989  | 0.0218 | 0      | 0.1505 | g > t |                          |              |
| -18 | 0.9505 | 0.0941 | 0.0337 | 0.0152 | a > g |                          |              |
| -17 | 0.989  | 0.0218 | 0      | 0.1505 | g > t |                          |              |
| -10 | 0.989  | 0.0218 | 0      | 0.1596 | c > t |                          |              |
| -7  | 0.967  | 0.0638 | 0.0674 | 0.3491 | t > c |                          |              |
| -6  | 0.989  | 0.0218 | 0      | 0.1505 | a > g |                          |              |
| -5  | 0.989  | 0.0218 | 0      | 0.1505 | a > g |                          |              |
| -4  | 0.9615 | 0.074  | 0.0112 | 0.2356 | g > a |                          |              |
| 6   | 0.9945 | 0.0109 |        | 0.3107 | G > A | ACG > ACA                | T            |
| 18  | 0.989  | 0.0218 | 0      | 0.1596 | G > C | CTG > CTC                | L            |
| 24  | 0.989  | 0.0218 | 0      | 0.1505 | A > T | ATA > ATT                | I            |
| 36  | 0.8901 | 0.1956 | 0.1124 | 0.3172 | C > T | TTC > TTT                | F            |
| 61  | 0.978  | 0.043  | 0      | 0.0409 | T > C | TCC > CCC                | S > P        |
| 64  | 0.989  | 0.0218 | 0      | 0.1596 | C > T | CCC > TCC                | P > S        |
| 71  | 0.9451 | 0.1038 | 0      | 0.5386 | T > - | GTA > G-A =<br>GT- > G-- | V > Fr.shift |
| 72  | 0.9451 | 0.1038 | 0      | 0.5386 | A > - |                          |              |

|     |                        |        |        |                                   |               |                                                                                                      |                                                                                  |
|-----|------------------------|--------|--------|-----------------------------------|---------------|------------------------------------------------------------------------------------------------------|----------------------------------------------------------------------------------|
| 73  | 0.9725, 0.0165         | 0.0539 | 0.0112 | 0.1659, 0.5476, 0.1505            | G > A > C     | GGA > GCA ><br>GGG > GGC ><br>AGA > GG- ><br>CGA = GCG ><br>GCC > GC- =<br>ACA = CCA ><br>AGG = AGC* | G > A > G > G<br>> R > Fr.shift ><br>R = A > A ><br>Fr.shift = T = P<br>> R = S* |
| 74  | 0.8352                 | 0.2753 | 0.0449 | 0.206                             | G > C         |                                                                                                      |                                                                                  |
| 75  | 0.8956, 0.0495, 0.0440 | 0.1934 | 0.0112 | 0.0331, 0.0183, 0.1572,<br>0.1505 | A > G > C > - |                                                                                                      |                                                                                  |
| 76  | 0.9451, 0.0440         | 0.1047 | 0      | 0.5386, 0.1572, 0.1505            | G > - > C     | GTA > -TA ><br>CTA                                                                                   | V > Fr.shift > L                                                                 |
| 81  | 0.9451                 | 0.1038 | 0      | 0.5386                            | T > C         | ACT > ACC                                                                                            | T                                                                                |
| 83  | 0.989                  | 0.0218 | 0      | 0.1505                            | G > A         | GGG > GGA ><br>GAG > GAA                                                                             | G > G > E > E                                                                    |
| 84  | 0.9121                 | 0.1603 | 0.0225 | 0.633                             | G > A         |                                                                                                      |                                                                                  |
| 87  | 0.989                  | 0.0218 | 0.0225 | 0.2063                            | G > A         | GCG > GCA                                                                                            | A                                                                                |
| 96  | 0.989                  | 0.0218 | 0      | 0.1505                            | G > A         | GTG > GTA                                                                                            | V                                                                                |
| 120 | 0.9945                 | 0.0109 | 0.0112 | 0.3107                            | C > T         | GTC > GTT                                                                                            | V                                                                                |
| 132 | 0.989                  | 0.0218 |        | 0.1505                            | C > T         | GAC > GAT                                                                                            | D                                                                                |

|     |                |        |        |                        |           |                                                        |                                  |
|-----|----------------|--------|--------|------------------------|-----------|--------------------------------------------------------|----------------------------------|
| 133 | 0.989          | 0.0218 | 0      | 0.1596                 | T > A     | TCG > TCA =<br>ACG > ACA                               | S > S = T > T                    |
| 135 | 0.9835         | 0.0325 | 0.0112 | 0.0774                 | G > A     |                                                        |                                  |
| 138 | 0.989          | 0.0218 | 0      | 0.1596                 | C > T     | TTC > TTT                                              | F                                |
| 152 | 0.9945         | 0.0109 | 0.0112 | 0.3107                 | T > C     | GTT > GCT                                              | V > A                            |
| 154 | 0.978          | 0.043  | 0.0225 | 0.3227                 | T > C     | TCG > TTG ><br>CCG > CTG ><br>TCA > TTA ><br>CCA > CTA | S > L > P > L ><br>S > L > P > L |
| 155 | 0.5659         | 0.4913 | 0.2472 | 0.2578                 | C > T     |                                                        |                                  |
| 156 | 0.989          | 0.0218 | 0      | 0.1596                 | G > A     |                                                        |                                  |
| 162 | 0.989          | 0.0218 | 0      | 0.1596                 | C > T     | ATC > ATT                                              | I                                |
| 169 | 0.9945         | 0.0109 | 0.0112 | 0.3107                 | G > A     | GCT > GAT ><br>ACT > AAT                               | A > D > T > N                    |
| 170 | 0.989          | 0.0218 | 0      | 0.1596                 | C > A     |                                                        |                                  |
| 174 | 0.989          | 0.0218 | 0      | 0.1505                 | G > A     | GAG > GAA                                              | E                                |
| 180 | 0.9835         | 0.0325 | 0      | 0.0774                 | C > T     | GCC > GCT                                              | A                                |
| 189 | 0.8626, 0.0824 | 0.2461 | 0.0112 | 0.4807, 0.1638, 0.5386 | C > G > A | GGC > GGG ><br>GGA                                     | G                                |
| 191 | 0.9945         | 0.0109 |        | 0.3107                 | T > A     | TTT > TAT                                              | F > Y                            |

|     |                |        |        |                        |           |                          |                     |
|-----|----------------|--------|--------|------------------------|-----------|--------------------------|---------------------|
| 194 | 0.9945         | 0.0109 | 0.0112 | 0.3213                 | A > C     | TAC > TAA =<br>TCC > TCA | Y > stop > S ><br>S |
| 195 | 0.9945         | 0.0109 | 0.0112 | 0.3107                 | C > A     |                          |                     |
| 201 | 0.9945         | 0.0109 | 0.0112 | 0.3107                 | C > T     | GTC > GTT                | V                   |
| 205 | 0.9231         | 0.142  | 0.0225 | 0.2479                 | C > G     | CCA > GCA ><br>CCC > GCC | P > A > P > A       |
| 207 | 0.989          | 0.0218 | 0      | 0.1596                 | A > C     |                          |                     |
| 213 | 0.9945         | 0.0109 | 0.0112 | 0.3107                 | T > C     | GAT > GAC                | D                   |
| 227 | 0.9945         | 0.0109 | 0.0112 | 0.3107                 | A > T     | TAC > TTC                | Y > F               |
| 237 | 0.9835         | 0.0325 | 0.0337 | 0.5476                 | A > C     | CGA > CGC                | R                   |
| 246 | 0.9945         | 0.0109 | 0.0112 | 0.3107                 | C > T     | ATC > ATT                | I                   |
| 249 | 0.9945         | 0.0109 | 0.0112 | 0.3107                 | A > G     | GGA > GGG                | G                   |
| 252 | 0.9396         | 0.1135 | 0.0112 | 0.3705                 | G > A     | CTG > CTA                | L                   |
| 258 | 0.9945         | 0.0109 | 0.0112 | 0.3107                 | G > A     | GAG > GAA                | E                   |
| 267 | 0.9945         | 0.0109 | 0.0112 | 0.3213                 | C > T     | GAC > GAT                | D                   |
| 276 | 0.9835         | 0.0325 | 0.0112 | 0.0841                 | T > C     | CTT > CTC                | L                   |
| 297 | 0.7198, 0.2747 | 0.4064 | 0.2809 | 0.3587, 0.4499, 0.3107 | C > A > G | TCC > TCA ><br>TCG       | S                   |
| 303 | 0.9945         | 0.0109 | 0.0112 | 0.3213                 | C > T     | TAC > TAT                | Y                   |
| 313 | 0.9945         | 0.0109 | 0.0112 | 0.3107                 | C > T     | CTG > TTG                | L                   |
| 318 | 0.9835         | 0.0325 | 0.0112 | 0.0841                 | T > A     | CGT > CGA                | R                   |
| 327 | 0.967          | 0.0638 | 0      | 0.391                  | A > G     | CAA > CAG                | Q                   |
| 330 | 0.967          | 0.0638 | 0      | 0.391                  | C > A     | ACC > ACA                | T                   |
| 333 | 0.9945         | 0.0109 | 0.0112 | 0.3107                 | C > T     | ACC > ACT                | T                   |



|     |                |        |        |                        |           |                    |       |
|-----|----------------|--------|--------|------------------------|-----------|--------------------|-------|
| 354 | 0.9945         | 0.0109 | 0.0112 | 0.3213                 | C > T     | AGC > AGT          | S     |
| 366 | 0.9231         | 0.142  | 0.0899 | 0.5093                 | G > A     | CAG > CAA          | Q     |
| 369 | 0.9615         | 0.074  | 0.0112 | 0.678                  | G > T     | CTG > CTT          | L     |
| 372 | 0.9725         | 0.0535 | 0.0337 | 0.6682                 | G > A     | CCG > CCA          | P     |
| 384 | 0.9835         | 0.0325 | 0.0337 | 0.5734                 | C > T     | TAC > TAT          | Y     |
| 390 | 0.9945         | 0.0109 | 0.0112 | 0.3213                 | C > A     | ACC > ACA          | S     |
| 402 | 0.9725         | 0.0535 | 0.0562 | 0.1817                 | G > A     | AGG > AGA          | R     |
| 417 | 0.9945         | 0.0109 | 0.0112 | 0.3213                 | C > T     | TCC > TCT          | S     |
| 420 | 0.9835         | 0.0325 | 0.0225 | 0.5734                 | G > A     | GTG > GTA          | V     |
| 423 | 0.9725         | 0.0535 | 0.0562 | 0.1817                 | A > T     | GCA > GCT          | A     |
| 429 | 0.989          | 0.0218 | 0      | 0.1505                 | T > C     | AAT > AAC          | N     |
| 438 | 0.989          | 0.0218 | 0.0225 | 0.1505                 | T > A     | TCT > TCA          | S     |
| 441 | 0.8956         | 0.187  | 0.2135 | 0.4366                 | G > A     | TCG > TCA          | S     |
| 444 | 0.9835         | 0.0325 | 0.0337 | 0.5734                 | G > C     | TCG > TCC          | S     |
| 448 | 0.9615         | 0.074  | 0.0787 | 0.678                  | C > A     | CGA > AGA          | A     |
| 456 | 0.967          | 0.0638 | 0      | 0.0138                 | T > C     | AGT > AGC          | S     |
| 462 | 0.7637, 0.1538 | 0.3863 | 0.1011 | 0.6592, 0.6657, 0.4447 | T > A > C | GGT > GGA ><br>GGC | G     |
| 468 | 0.9945         | 0.0109 | 0.0112 | 0.3107                 | A > G     | CTA > CTG          | L     |
| 471 | 0.989          | 0.0218 | 0.0225 | 0.2063                 | G > A     | TCG > TCA          | S     |
| 480 | 0.989          | 0.0218 | 0.0225 | 0.2063                 | C > T     | CCC > CCT          | P     |
| 483 | 0.9451         | 0.1038 | 0      | 0.5386                 | C > T     | AGC > AGT          | S     |
| 490 | 0.9945         | 0.0109 | 0.0112 | 0.3107                 | A > C     | ACG > CCG          | T > P |
| 508 | 0.9451         | 0.1038 | 0      | 0.5386                 | T > C     | TTA > CTA          | L     |
| 523 | 0.989          | 0.0218 | 0.0112 | 0.2063                 | A > G     | ATC > GTC          | I > V |

|     |                |        |        |                        |           |                                                        |                                     |
|-----|----------------|--------|--------|------------------------|-----------|--------------------------------------------------------|-------------------------------------|
| 526 | 0.7802         | 0.343  | 0.2247 | 0.087                  | C > G     | CCC > GCC ><br>CCT > GCT                               | P > A > P > A                       |
| 528 | 0.989          | 0.0218 | 0      | 0.1505                 | C > T     |                                                        |                                     |
| 540 | 0.9945         | 0.0109 | 0.0112 | 0.3213                 | T > A     | CCT > CCA                                              | P                                   |
| 541 | 0.9451         | 0.1038 | 0      | 0.5386                 | G > C     | GCG > GTG ><br>GCA > CTG ><br>GTA > CCG ><br>CCA > CTA | A > V > A > L<br>> V > P > P ><br>L |
| 542 | 0.7637         | 0.3609 | 0.3258 | 0.0288                 | C > T     |                                                        |                                     |
| 543 | 0.978          | 0.043  | 0      | 0.2884                 | G > A     |                                                        |                                     |
| 546 | 0.9945         | 0.0109 | 0.0112 | 0.3213                 | C > T     | CCC > CCT                                              | P                                   |
| 549 | 0.9396         | 0.1135 | 0.0112 | 0.7837                 | G > A     | GCG > GCA                                              | A                                   |
| 555 | 0.6703         | 0.442  | 0.0225 | 0.0023                 | A > T     | CCA > CCT                                              | P                                   |
| 561 | 0.967          | 0.0638 | 0.0449 | 0.1024                 | G > A     | CAG > CAA                                              | Q                                   |
| 565 | 0.978          | 0.043  | 0.0449 | 0.3227                 | C > A     | CGG > AGG                                              | R                                   |
| 570 | 0.9176         | 0.1512 | 0.1573 | 0.0534                 | G > A     | CCG > CCA                                              | P                                   |
| 594 | 0.9835         | 0.0325 | 0.0337 | 0.5476                 | G > A     | GAG > GAA                                              | E                                   |
| 597 | 0.9615         | 0.074  | 0.0112 | 0.2598                 | G > A     | GCG > GCA                                              | A                                   |
| 600 | 0.8516         | 0.2528 | 0.2135 | 0.4917                 | G > A     | AAG > AAA                                              | K                                   |
| 603 | 0.5549, 0.2473 | 0.5918 | 0.4831 | 0.2264, 0.1439, 0.7222 | A > C > G | CGA > CGC ><br>CGG                                     | R                                   |

|     |                |        |        |                        |           |                          |               |
|-----|----------------|--------|--------|------------------------|-----------|--------------------------|---------------|
| 604 | 0.5989         | 0.4804 | 0.191  | 0.123                  | C > T     | CTG > TTG ><br>CTA > TTA | L             |
| 606 | 0.7418         | 0.3831 | 0.2809 | 0.0758                 | G > A     |                          |               |
| 615 | 0.9945         | 0.0109 | 0.0112 | 0.3107                 | C > T     | TAC > TAT                | Y             |
| 639 | 0.5879         | 0.4845 | 0.3483 | 0.139                  | G > A     | AAG > AAA                | K             |
| 645 | 0.9945         | 0.0109 | 0.0112 | 0.3107                 | G > A     | AAG > AAA                | K             |
| 657 | 0.9945         | 0.0109 | 0.0112 | 0.3107                 | A > T     | CTA > CTT                | L             |
| 666 | 0.8956         | 0.187  | 0.0787 | 0.2454                 | C > T     | GCC > GCT                | A             |
| 675 | 0.9945         | 0.0109 | 0.0112 | 0.3107                 | C > T     | TTC > TTT                | F             |
| 681 | 0.9396, 0.0440 | 0.1149 | 0.1011 | 0.0324, 0.1572, 0.0841 | T > C > A | ACT > ACC ><br>ACA       | T             |
| 693 | 0.9780, 0.0165 | 0.0432 | 0.0225 | 0.3227, 0.0841, 0.3107 | T > G > C | GAT > GAG ><br>GAC       | D > E > D     |
| 694 | 0.989          | 0.0218 | 0      | 0.1596                 | C > G     | CGA > CGT ><br>GGA > GGT | R > R > G > G |
| 696 | 0.8242         | 0.2898 | 0.0225 | 0.0162                 | A > T     |                          |               |
| 699 | 0.9725, 0.0220 | 0.0537 | 0.0337 | 0.1659, 0.3014, 0.3107 | C > G > A | GTC > GTG ><br>GTA       | V             |
| 710 | 0.989          | 0.0218 | 0      | 0.1596                 | G > T     | AGC > ATC                | S > I         |
| 723 | 0.9890, 0.0055 | 0.0218 | 0.0225 | 0.1505, 0.3107, 0.3107 | C > G = A | GGC > GGG =<br>GGA       | G             |
| 727 | 0.989          | 0.0218 | 0      | 0.1596                 | A > C     | AAG > AAA ><br>CAG > CAA | K > K > Q > Q |

|      |                |        |        |                        |           |                       |               |
|------|----------------|--------|--------|------------------------|-----------|-----------------------|---------------|
| 729  | 0.9835         | 0.0325 | 0.0112 | 0.5734                 | G > A     |                       |               |
| 744  | 0.9111         | 0.162  | 0.0225 | 0.6004                 | G > A     | GAG > GAA             | E             |
| 775  | 0.9945         | 0.0109 | 0.0112 | 0.3107                 | T > C     | TAT > CAT             | Y > H         |
| 783  | 0.9451         | 0.1038 | 0      | 0.5386                 | T > C     | AAT > AAC             | N             |
| 806  | 0.9945         | 0.0109 | 0.0112 | 0.3107                 | A > C     | AAA > ACA             | K > T         |
| 816  | 0.9341         | 0.1231 | 0      | 0.477                  | A > G     | GAA > GAG             | E             |
| 822  | 0.9945         | 0.0109 | 0.0112 | 0.3213                 | C > T     | ATC > ATT             | I             |
| 825  | 0.967          | 0.0638 | 0      | 0.422                  | C > T     | GCC > GCT             | A             |
| 861  | 0.9945         | 0.0109 | 0.0112 | 0.3213                 | G > C     | CAG > CAC             | Q > H         |
| 879  | 0.9451, 0.0495 | 0.1043 | 0.0112 | 0.5386, 0.7577, 0.3213 | G > T > C | GGG > GGT > GGC       | G             |
| 918  | 0.978          | 0.043  | 0      | 0.2884                 | A > T     | ACA > ACT             | T             |
| 921  | 0.989          | 0.0218 | 0      | 0.1596                 | C > T     | TCC > TCT             | S             |
| 954  | 0.9725         | 0.0535 | 0.0225 | 0.1659                 | G > A     | TCG > TCA             | S             |
| 966  | 0.956          | 0.0841 | 0      | 0.1572                 | T > C     | AGT > AGC             | S             |
| 969  | 0.956          | 0.0841 | 0      | 0.1572                 | A > T     | GCA > GCT             | A             |
| 972  | 0.9505         | 0.0941 | 0.0225 | 0.3212                 | G > A     | TCG > TCA             | S             |
| 984  | 0.9945         | 0.0109 | 0.0112 | 0.3213                 | C > T     | GTC > GTT             | V             |
| 994  | 0.6758         | 0.4382 | 0.0112 | 0.023                  | C > A     | CTC > ATC             | L > I         |
| 998  | 0.9945         | 0.0109 | 0.0112 | 0.3107                 | G > C     | GGC > GCC             | G > A         |
| 1010 | 0.9945         | 0.0109 | 0.0112 | 0.3107                 | G > T     | AGT > ATT             | S > I         |
| 1041 | 0.989          | 0.0218 | 0      | 0.1505                 | T > C     | AAT > AAC             | N             |
| 1059 | 0.9945         | 0.0109 | 0.0112 | 0.3213                 | T > C     | AGT > AGC             | S             |
| 1064 | 0.9451         | 0.1038 | 0      | 0.5386                 | T > C     | ATC > ACC > ATT > ACT | I > T > I > T |

|      |                |        |        |                                   |               |                          |   |
|------|----------------|--------|--------|-----------------------------------|---------------|--------------------------|---|
| 1065 | 0.956          | 0.0841 | 0      | 0.1572                            | C > T         |                          |   |
| 1089 | 0.6044         | 0.4782 | 0.0225 | 0.8408                            | A > G         | GAA > GAG                | E |
| 1104 | 0.989          | 0.0218 | 0      | 0.1505                            | C > T         | TTC > TTT                | F |
| 1107 | 0.8791         | 0.2126 | 0.0674 | 0.1904                            | G > A         | TCG > TCA                | S |
| 1110 | 0.9670, 0.0110 | 0.0645 | 0      | 0.0118, 0.1505, 0.1505,<br>0.1505 | C > A = G = T | CCC > CCA =<br>CCG = CCT | P |
| 1116 | 0.7033         | 0.4173 | 0.0674 | 0.0856                            | G > A         | GGG > GGA                | G |
| 1122 | 0.9945         | 0.0109 | 0.0112 | 0.3213                            | A > G         | GTA > GTG                | V |
| 1137 | 0.9505         | 0.0941 | 0.0112 | 0.7577                            | A > G         | AAA > AAG                | K |
| 1155 | 0.989          | 0.0218 | 0      | 0.1596                            | C > T         | ACC > ACT                | T |
| 1164 | 0.7527         | 0.3723 | 0.0787 | 0.4388                            | A > G         | CCA > CCG                | P |
| 1167 | 0.967          | 0.0638 | 0      | 0.391                             | C > T         | CTC > CTT                | L |
| 1221 | 0.9888         | 0.0221 | 0      | 0.1596                            | a > t         | A                        |   |

\* All remaining codon possibilities have a frequency of less than 0.0005

Polymorphic sites that are boxed occur within the same amino acid codon

Sites are the ones shown to be significant using PGtheta analysis of *AtIAP1* sequences.

Sites are ones in which nucleotide frequencies are out of Hardy-Weinberg equilibrium.
